# Supplementary material for: Developmentally regulated H2Av buffering via dynamic sequestration to lipid droplets in Drosophila embryos
Source: eLife journal article supplement (doi:10.7554/elife.36021), 2018-07-25
Supplement: supp [file elife-36021-supp-v1.zip]

Archive with 9 entries (9 files):
- elife_poa_e36021_Video_1.avi
- elife_poa_e36021_Figure_11_figure_supplement_1.pdf
- elife_poa_e36021_Figure_10_figure_supplement_2.pdf
- elife_poa_e36021_Transparent_Reporting_File.docx
- elife_poa_e36021_Figure_8_figure_supplement_1.pdf
- elife_poa_e36021_Figure_4_figure_supplement_1.pdf
- elife_poa_e36021_Figure_10_figure_supplement_3.pdf
- elife_poa_e36021_Figure_3_figure_supplement_1.pdf
- elife_poa_e36021_Figure_10_figure_supplement_1.pdf
