# Supplementary figures and images for: Developmentally regulated H2Av buffering via dynamic sequestration to lipid droplets in Drosophila embryos
Source: eLife journal article supplement (doi:10.7554/elife.36021), 2018-07-25

Figure 10-Figure Supplement 2

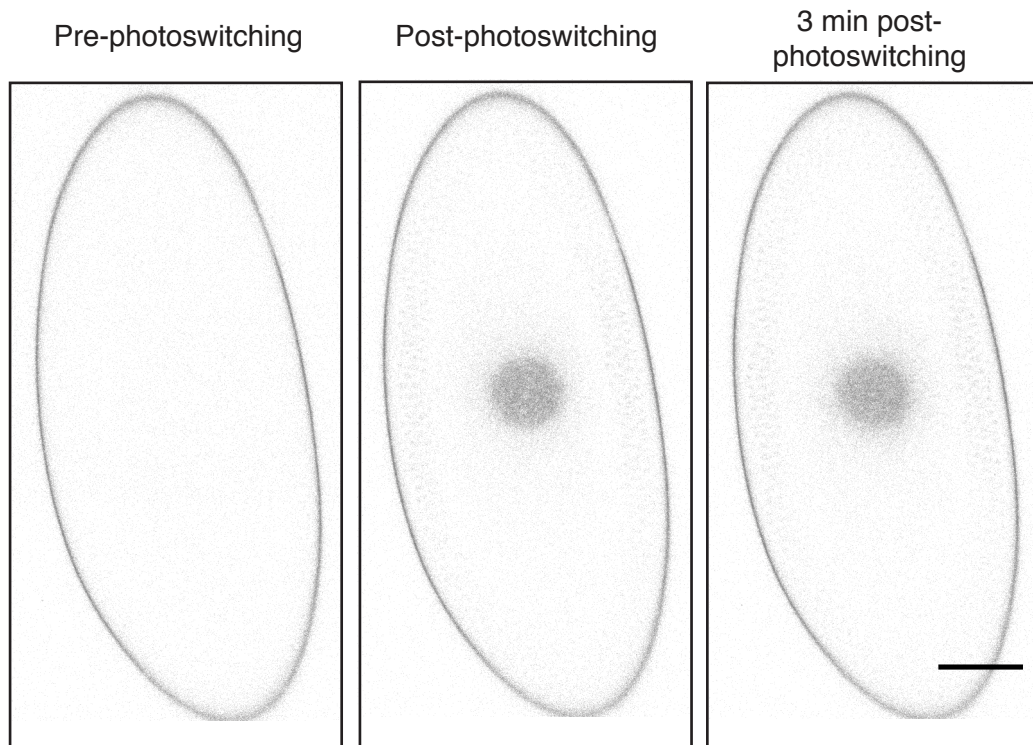

Supplement: supp [file elife-36021-supp-v1.zip]

Figure 11-Figure Supplement 1

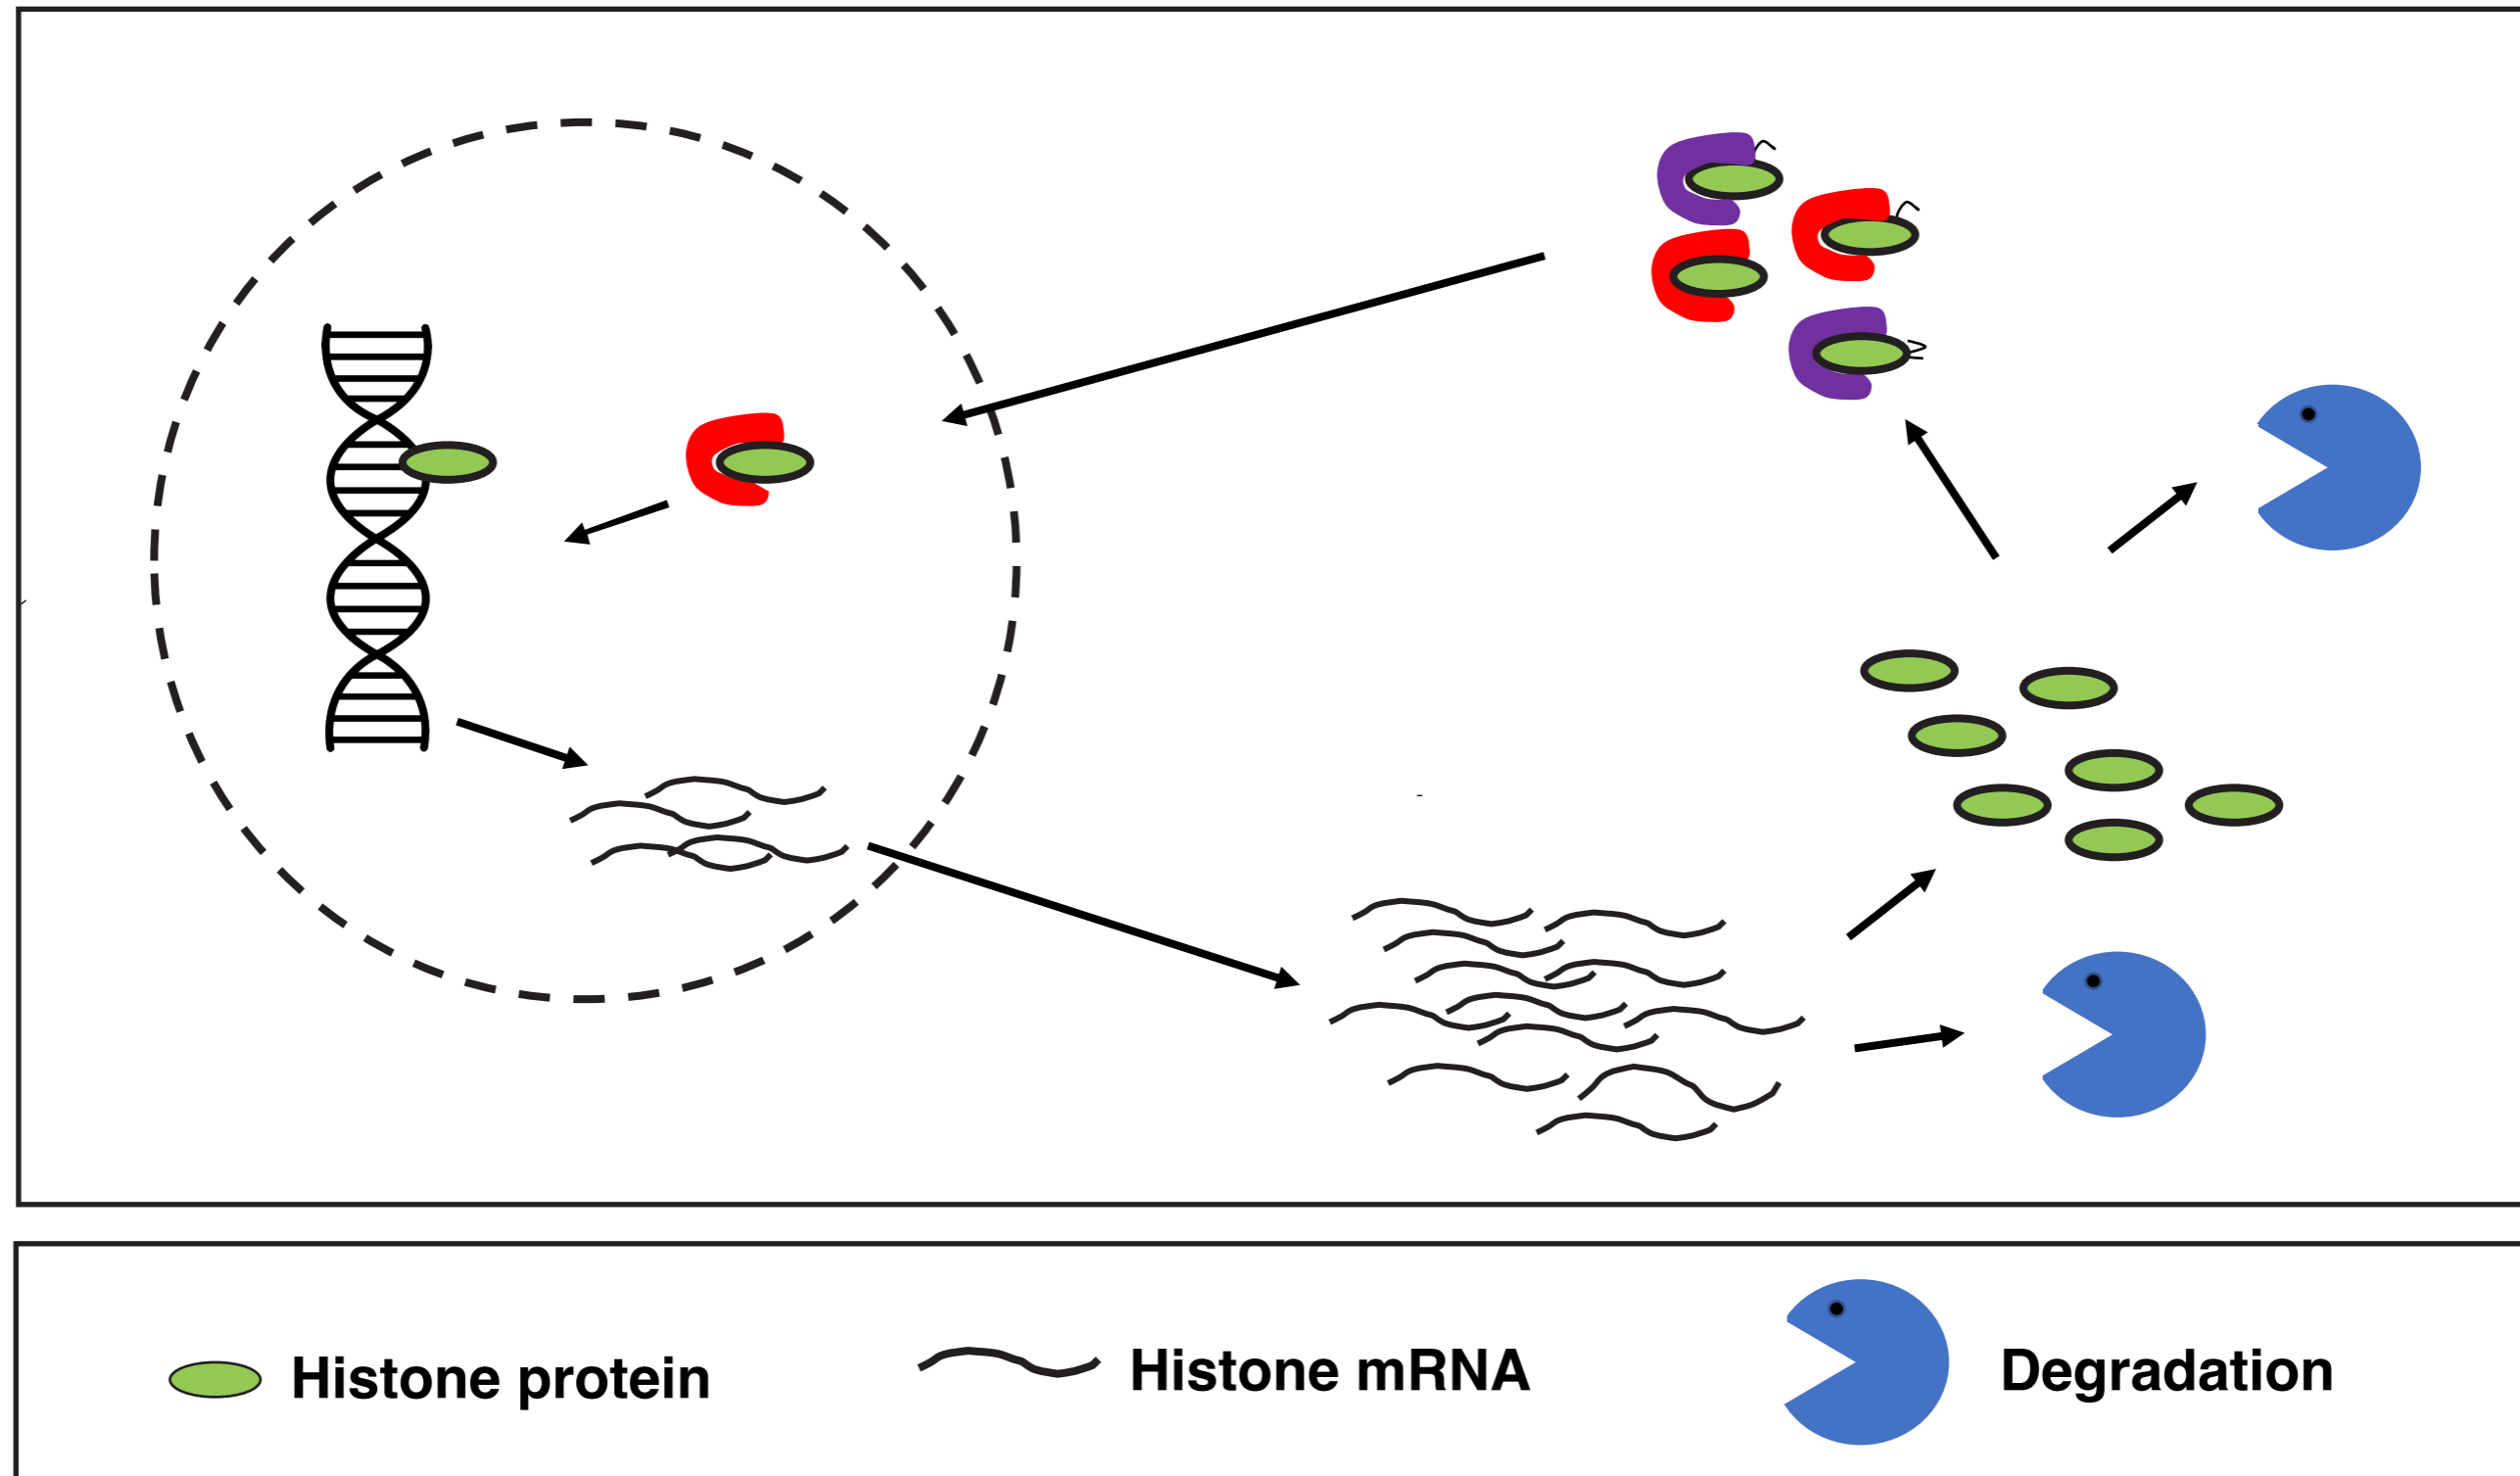

Supplement: supp [file elife-36021-supp-v1.zip › elife_poa_e36021_Figure_11_figure_supplement_1.pdf]

Figure 8-Figure Supplement 1

A

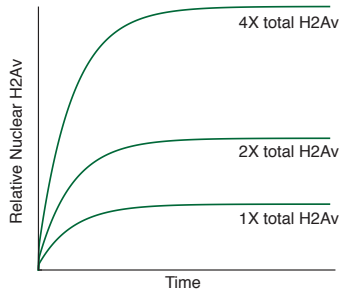

B

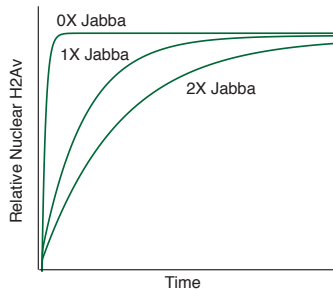

Supplement: supp [file elife-36021-supp-v1.zip › elife_poa_e36021_Figure_8_figure_supplement_1.pdf]

Figure 4-Figure Supplement 1

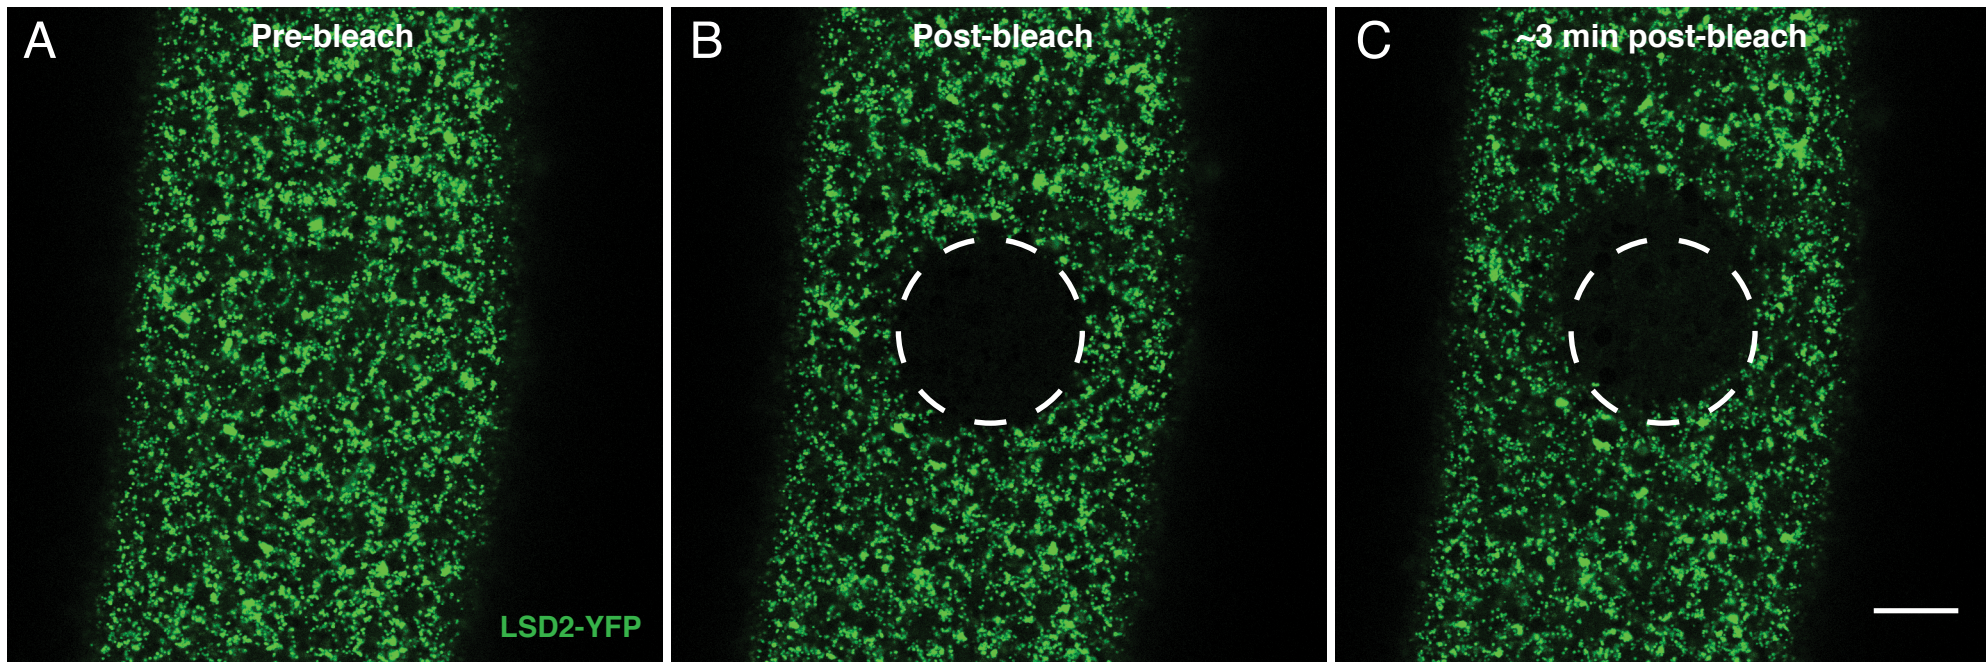

Supplement: supp [file elife-36021-supp-v1.zip › elife_poa_e36021_Figure_4_figure_supplement_1.pdf]

Figure 10-Figure Supplement 3

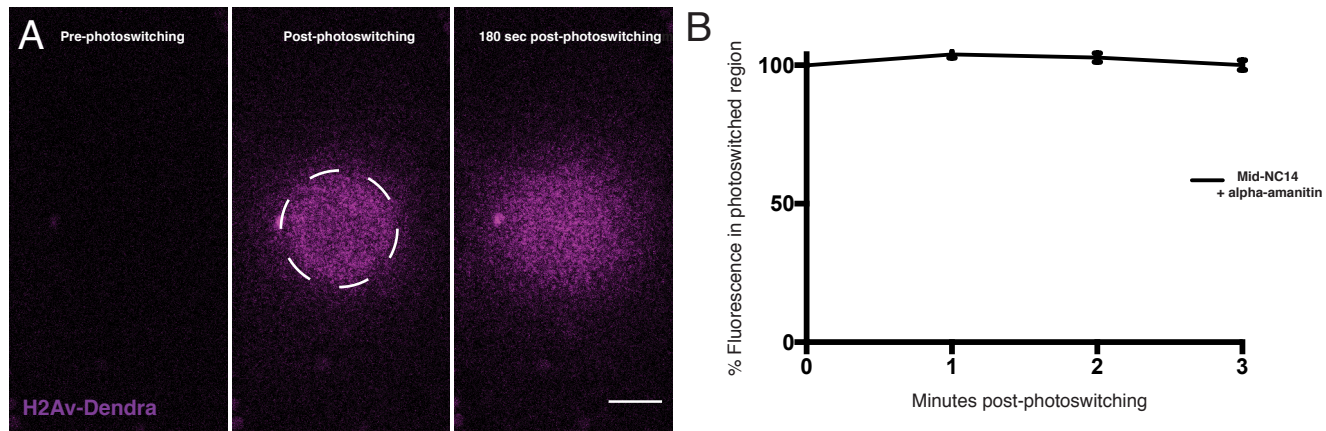

Supplement: supp [file elife-36021-supp-v1.zip › elife_poa_e36021_Figure_10_figure_supplement_3.pdf]

Figure 3-Figure Supplement 1

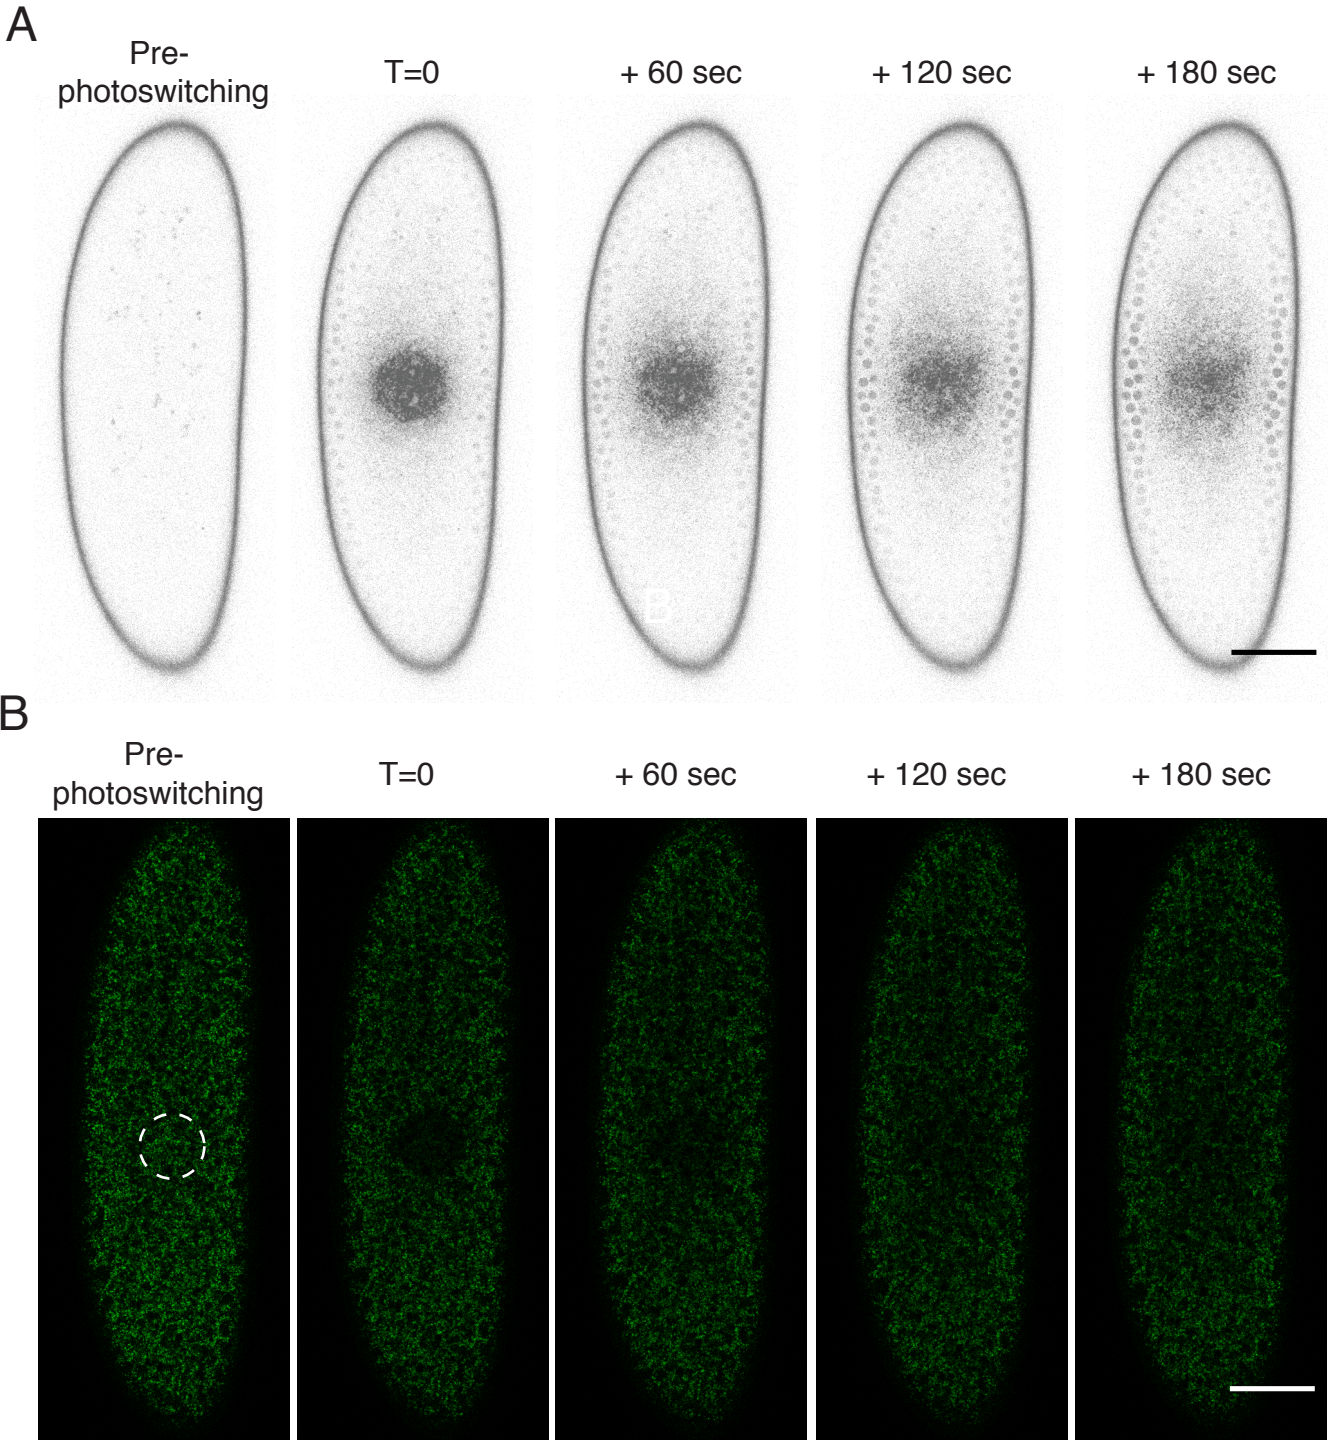

Supplement: supp [file elife-36021-supp-v1.zip › elife_poa_e36021_Figure_3_figure_supplement_1.pdf]

Figure 10-Figure Supplement 1

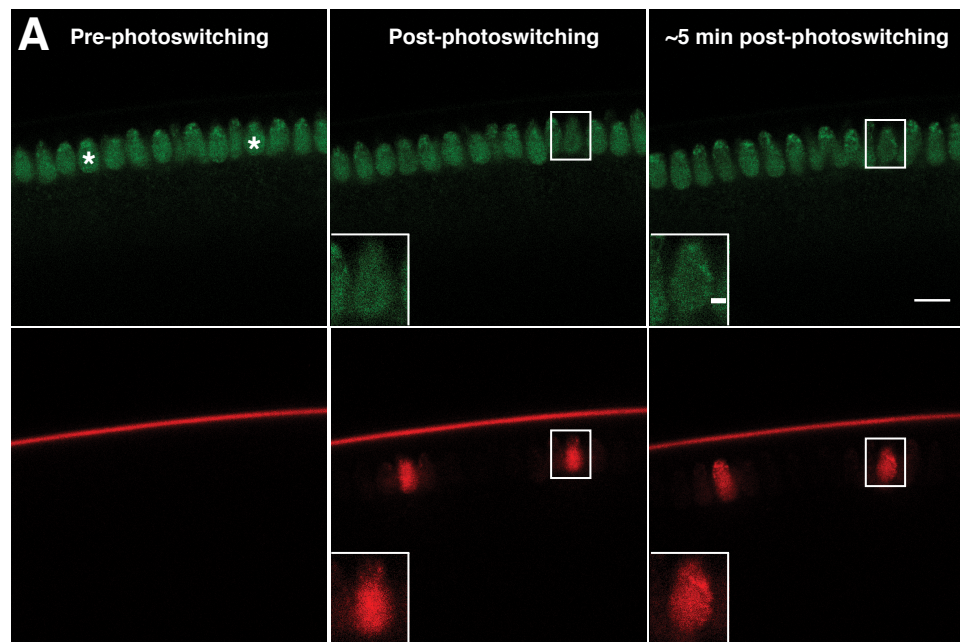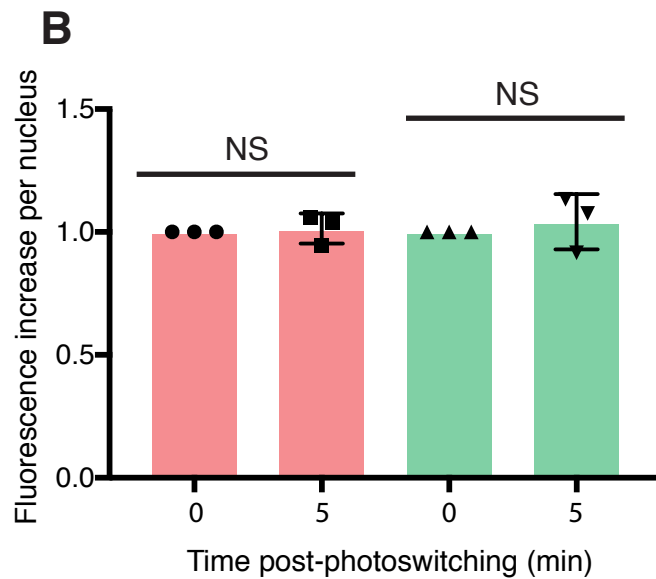

Supplement: supp [file elife-36021-supp-v1.zip › elife_poa_e36021_Figure_10_figure_supplement_1.pdf]
